# Supplementary material for: Cross-Tissue Transcriptomic Analysis Leveraging Machine Learning Approaches Identifies New Biomarkers for Rheumatoid Arthritis
Source: PubMed Central journal article supplement (PMC8223752; doi:10.3389/fimmu.2021.638066), 2021-06-08
Supplement: Presentation_1.pdf [file Presentation_1.pdf]

### Synovium

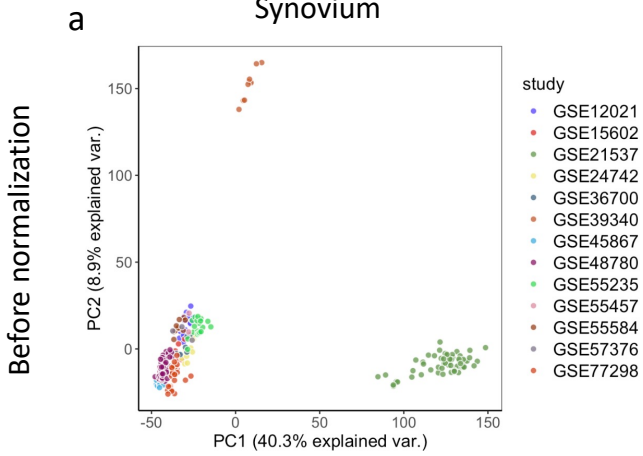

### Whole Blood

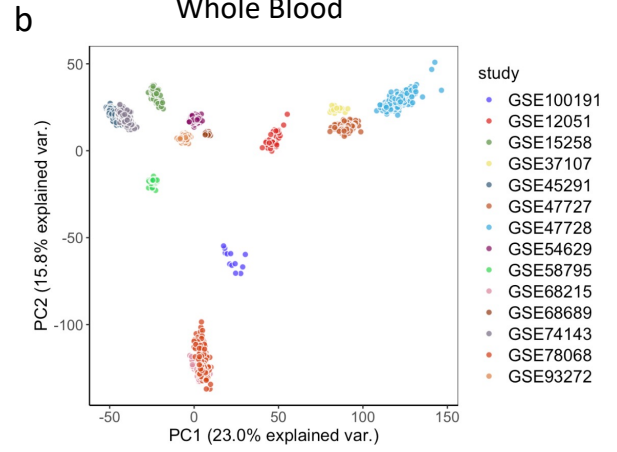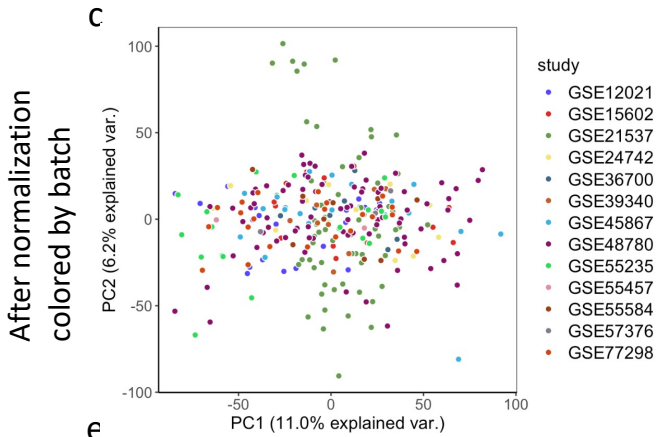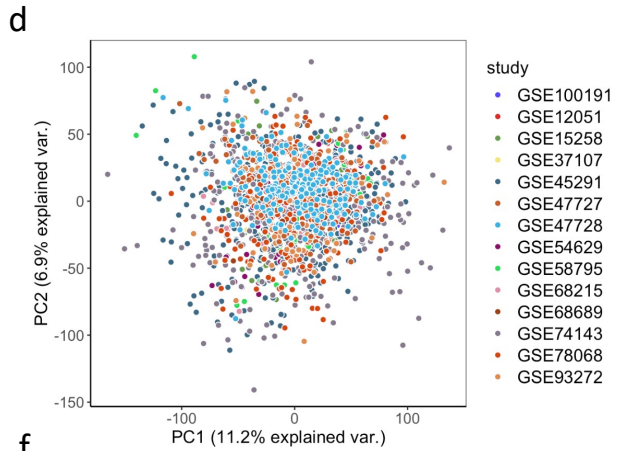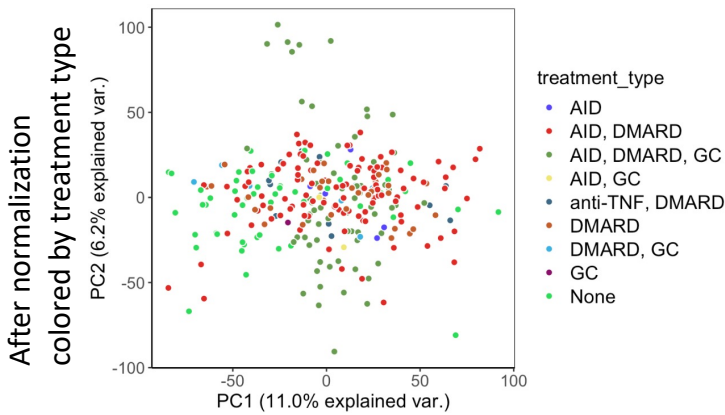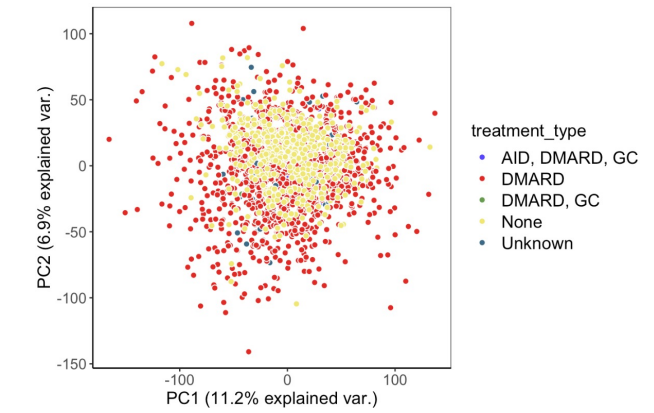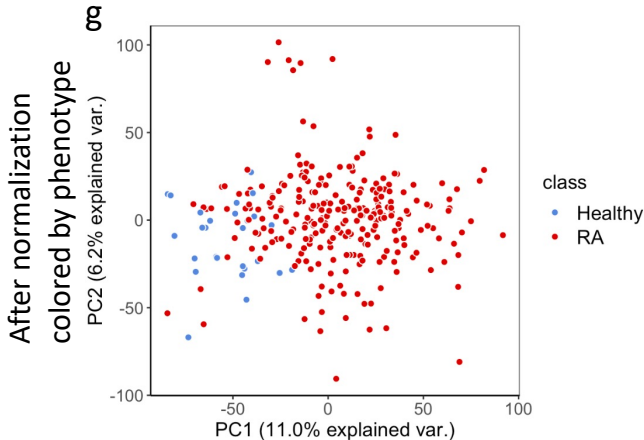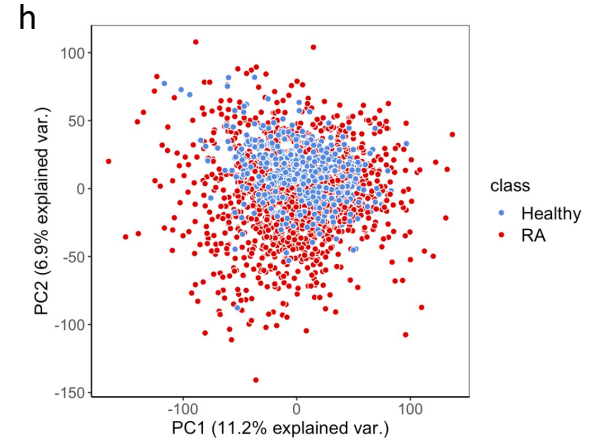

i

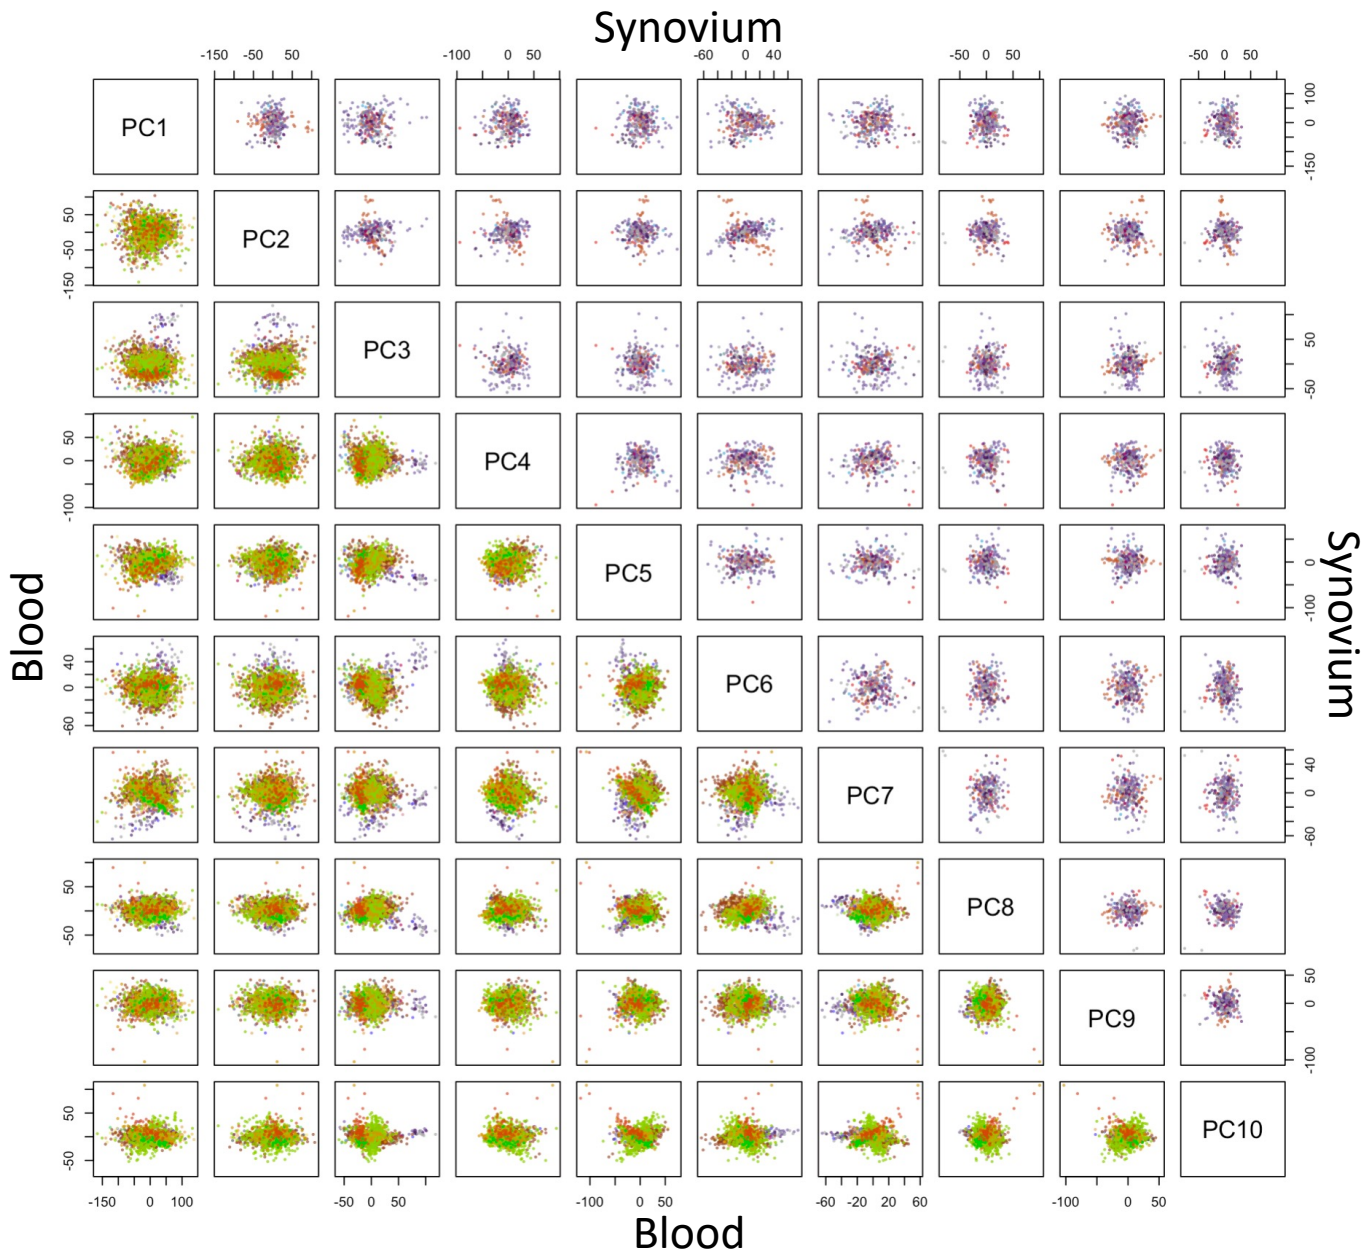

j

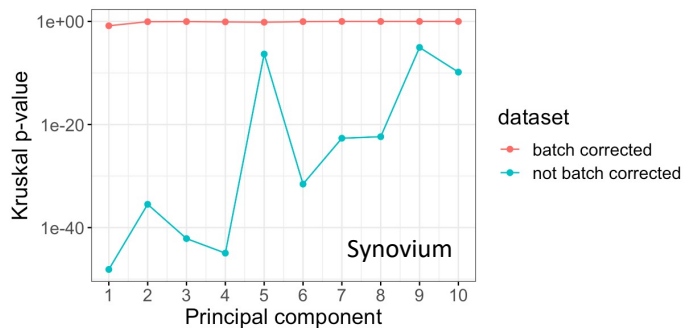

k

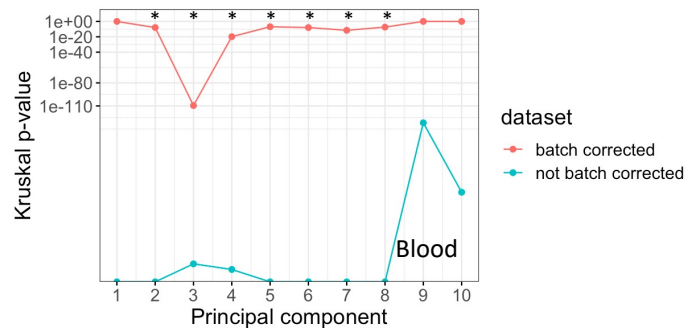

### Supplementary Figure 1. Discovery Data Batch Correction, QC and PCA plots

For synovium and whole blood: a) and b) before batch correction; c) and d) after normalization colored by batch; e) and f) after normalization colored by treatment type; g) and h) after normalization colored by phenotype. i) Scatter plot of the first 10 principal components of the batch corrected synovium (upper panel) and blood (lower panel) datasets.

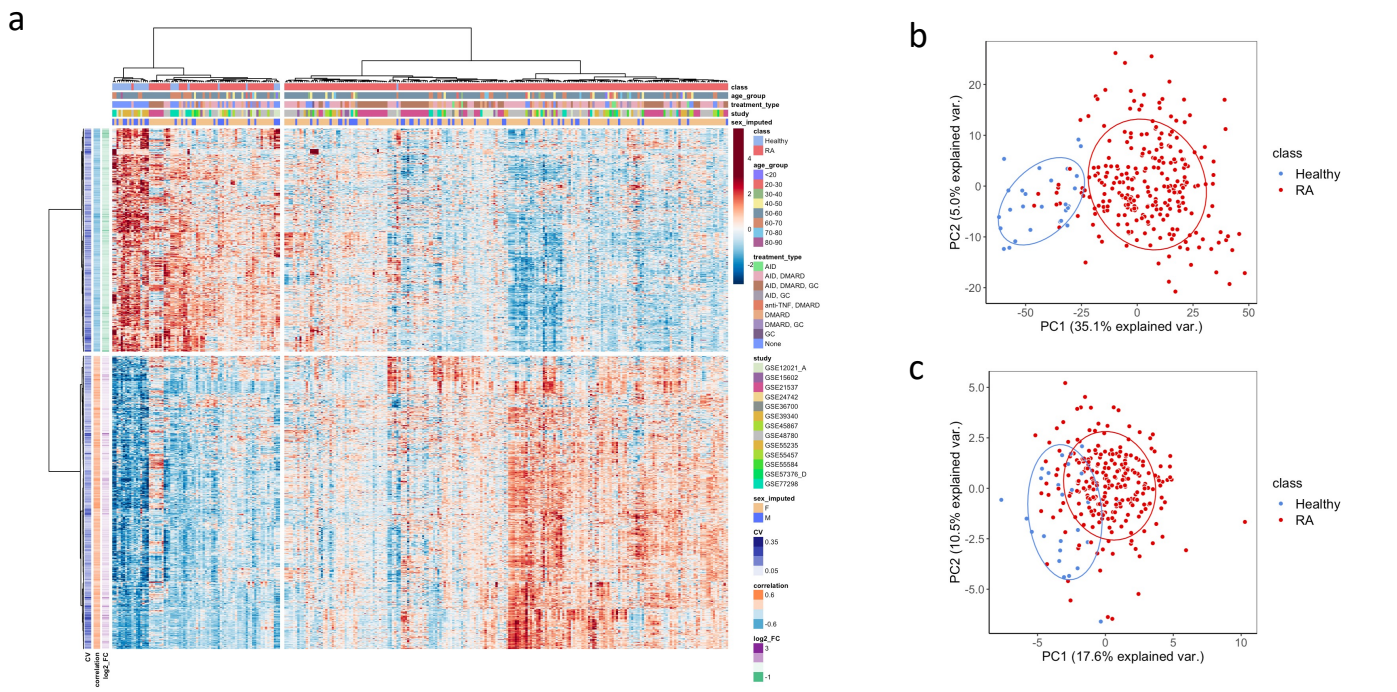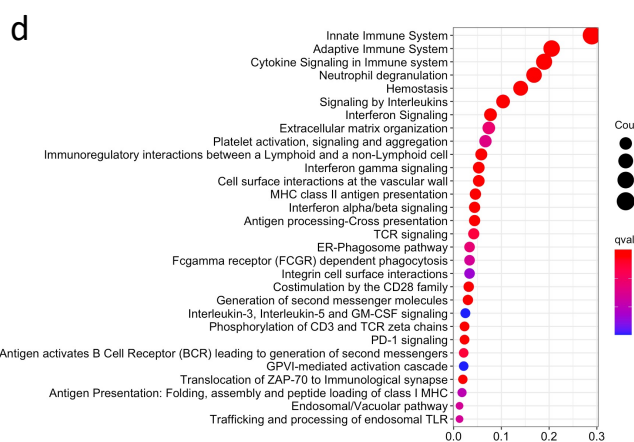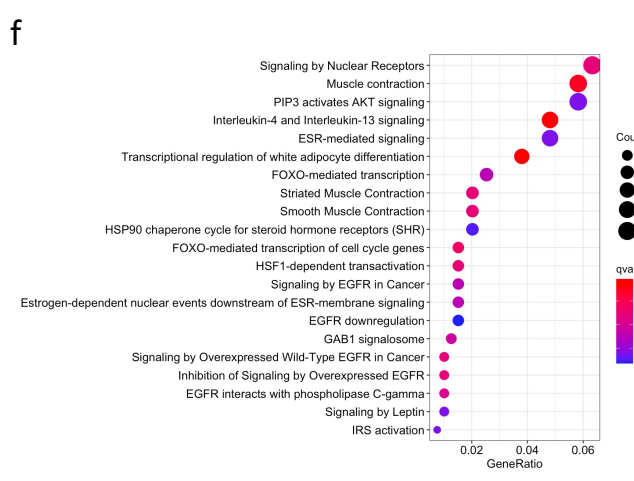

**Supplementary Figure 2. Synovium Differential Expression and Pathway Analysis**  
 DGE analysis in synovial tissue. a) Heatmap and b) PCA plot with DE genes. c) PCA plot with the 33 random genes. Reactome pathways for d) , e) up- and f), g) down-regulated genes.



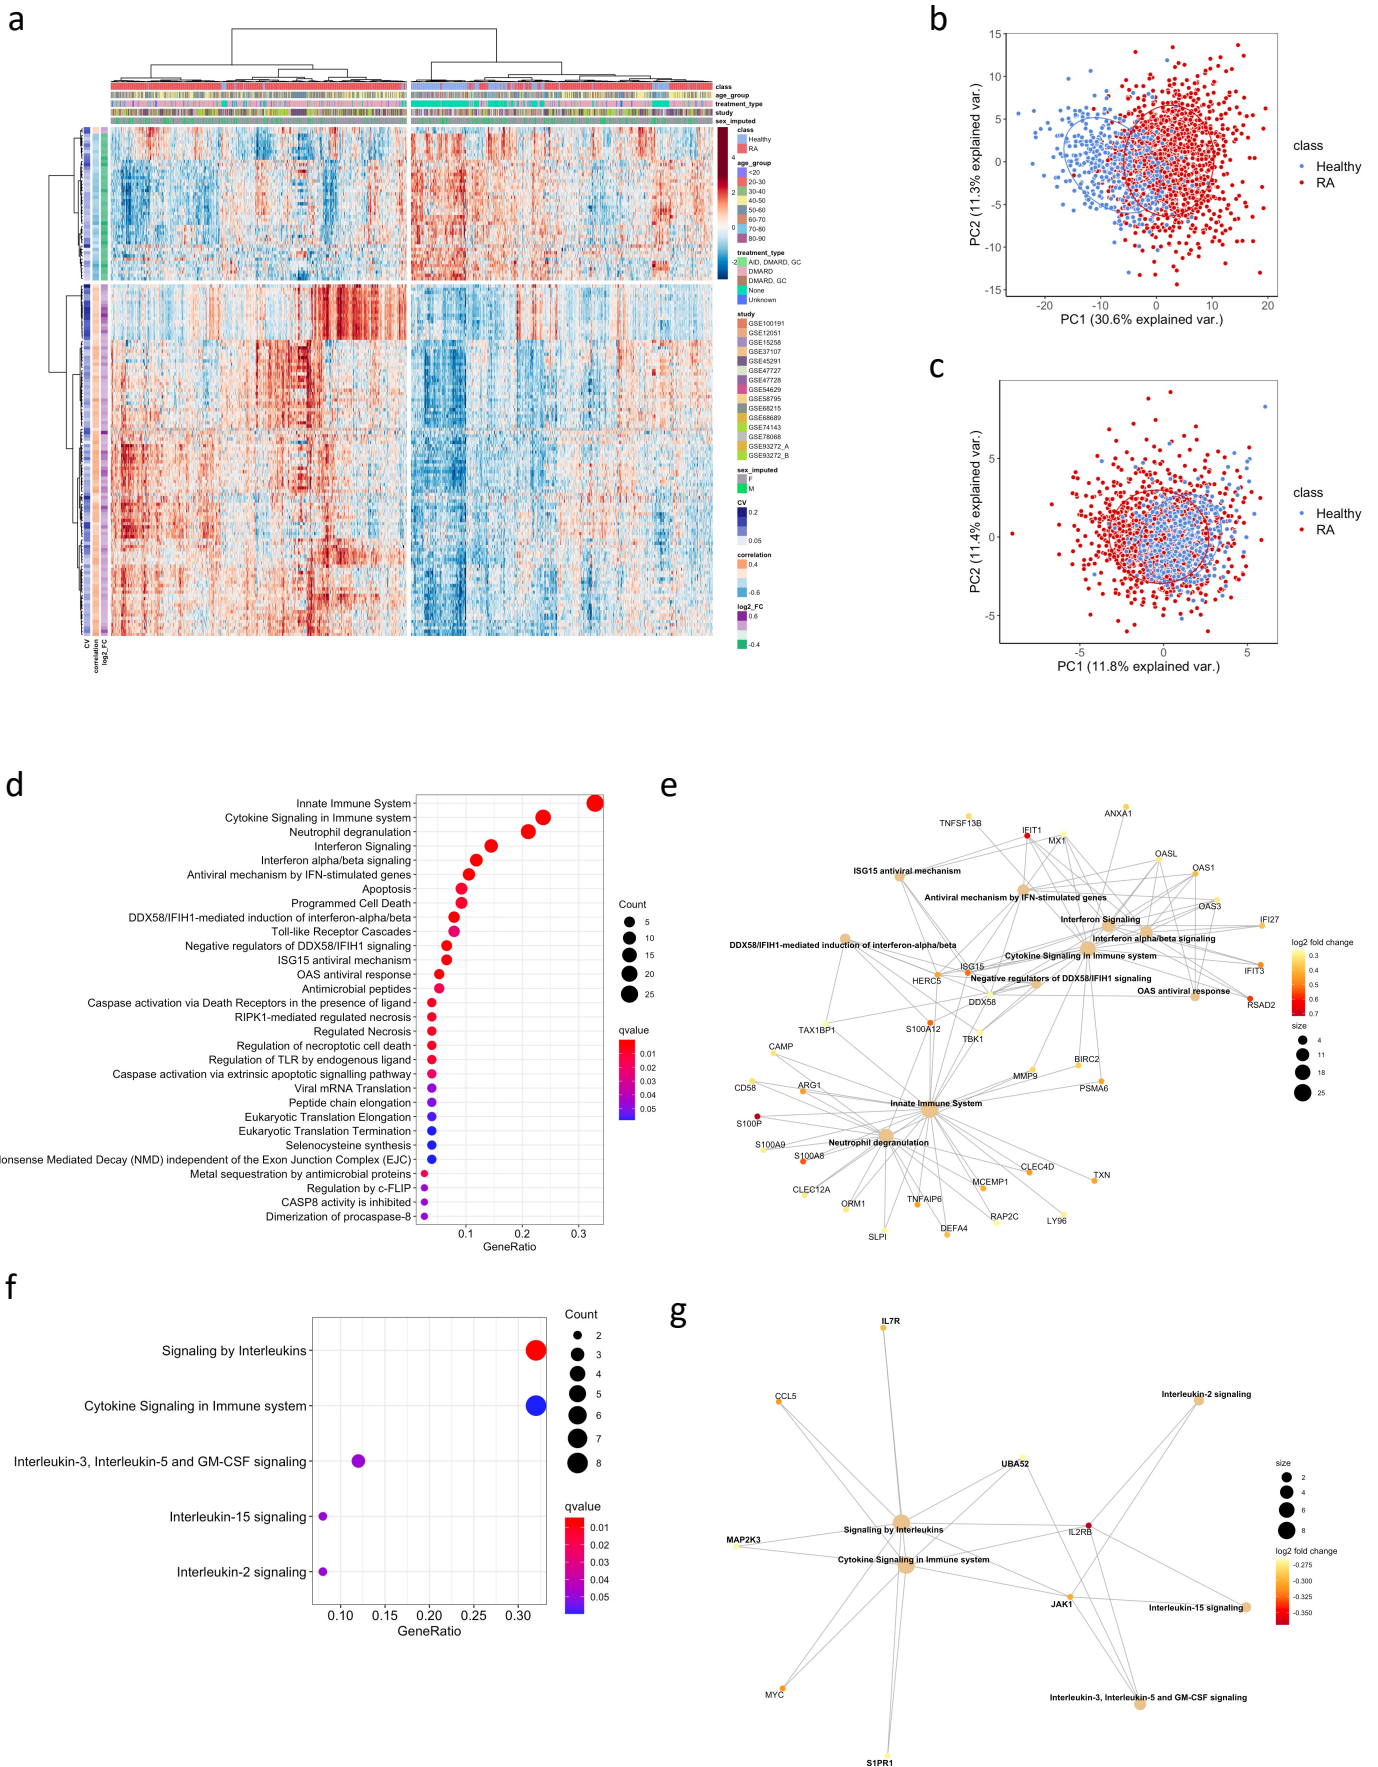

**Supplementary Figure 3. Synovium Differential Expression and Pathway Analysis**  
 DGE analysis in whole blood. a) Heatmap and b) PCA plot with DE genes. c) PCA plot with the 33 random genes. Reactome pathways for d), e) up- and f), g) down-regulated genes.



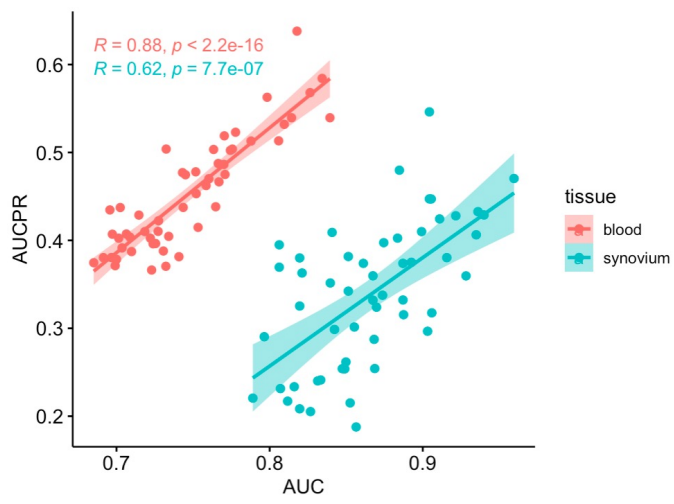

**Supplementary Figure 4. Pearson correlation between AUROC and AUCPR for testing synovium and blood datasets.**

## Logistic Regression

## Elastic Net

## Random Forest

Common genes

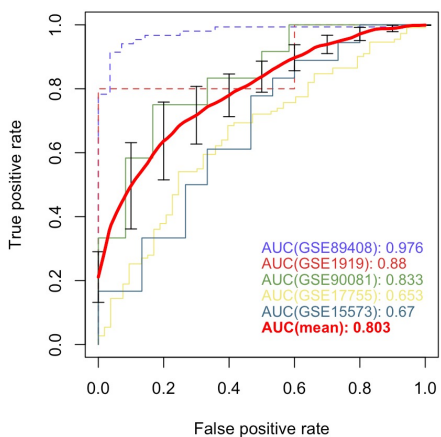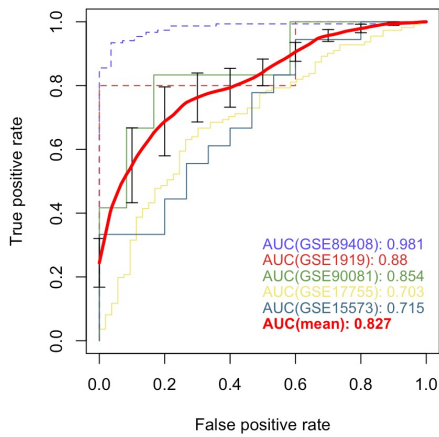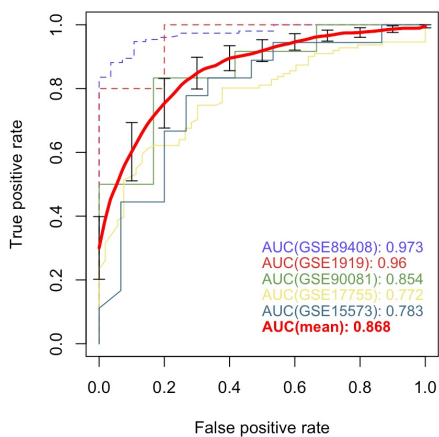

Feature selection genes

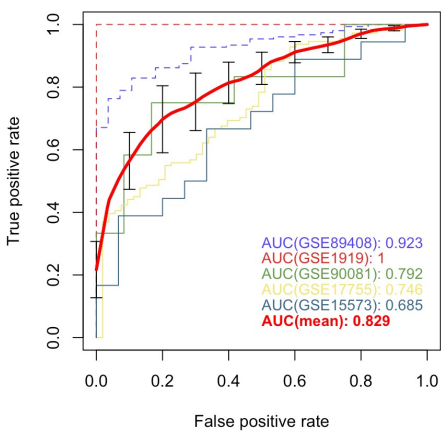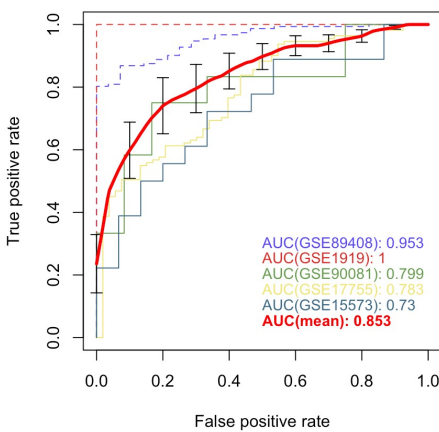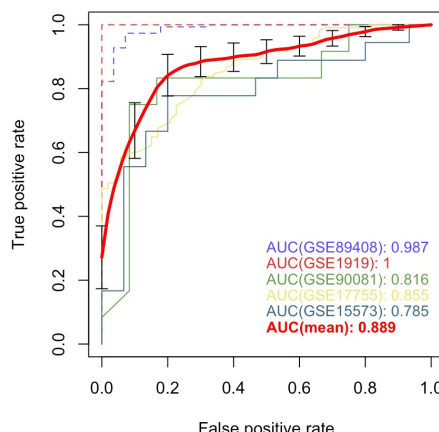

300 random genes

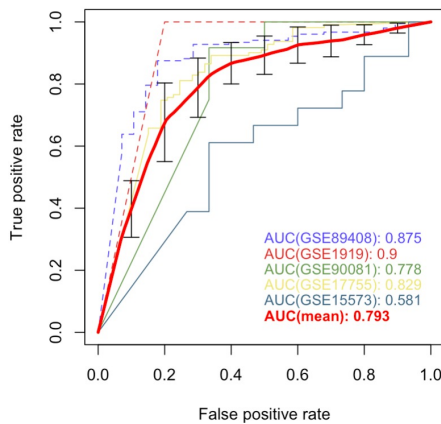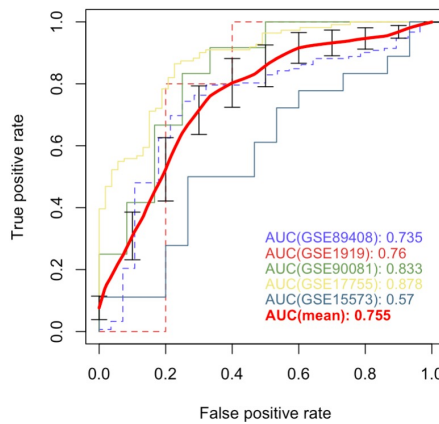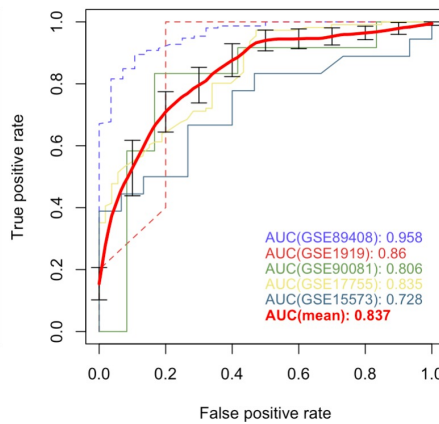

### Supplementary Figure 5. Machine Learning Model Comparison

AUROC plots for common and feature selected genes. Three models, a Logistic Regression, Elastic Net and Random Forest, were trained on the discovery whole blood data using either common genes, feature selected genes and 300 random genes and validated on 5 validation datasets. The summary curves are the averaged curves with bars of standard errors and colored by red. The dashed and solid lines represent synovium and blood data, respectively.

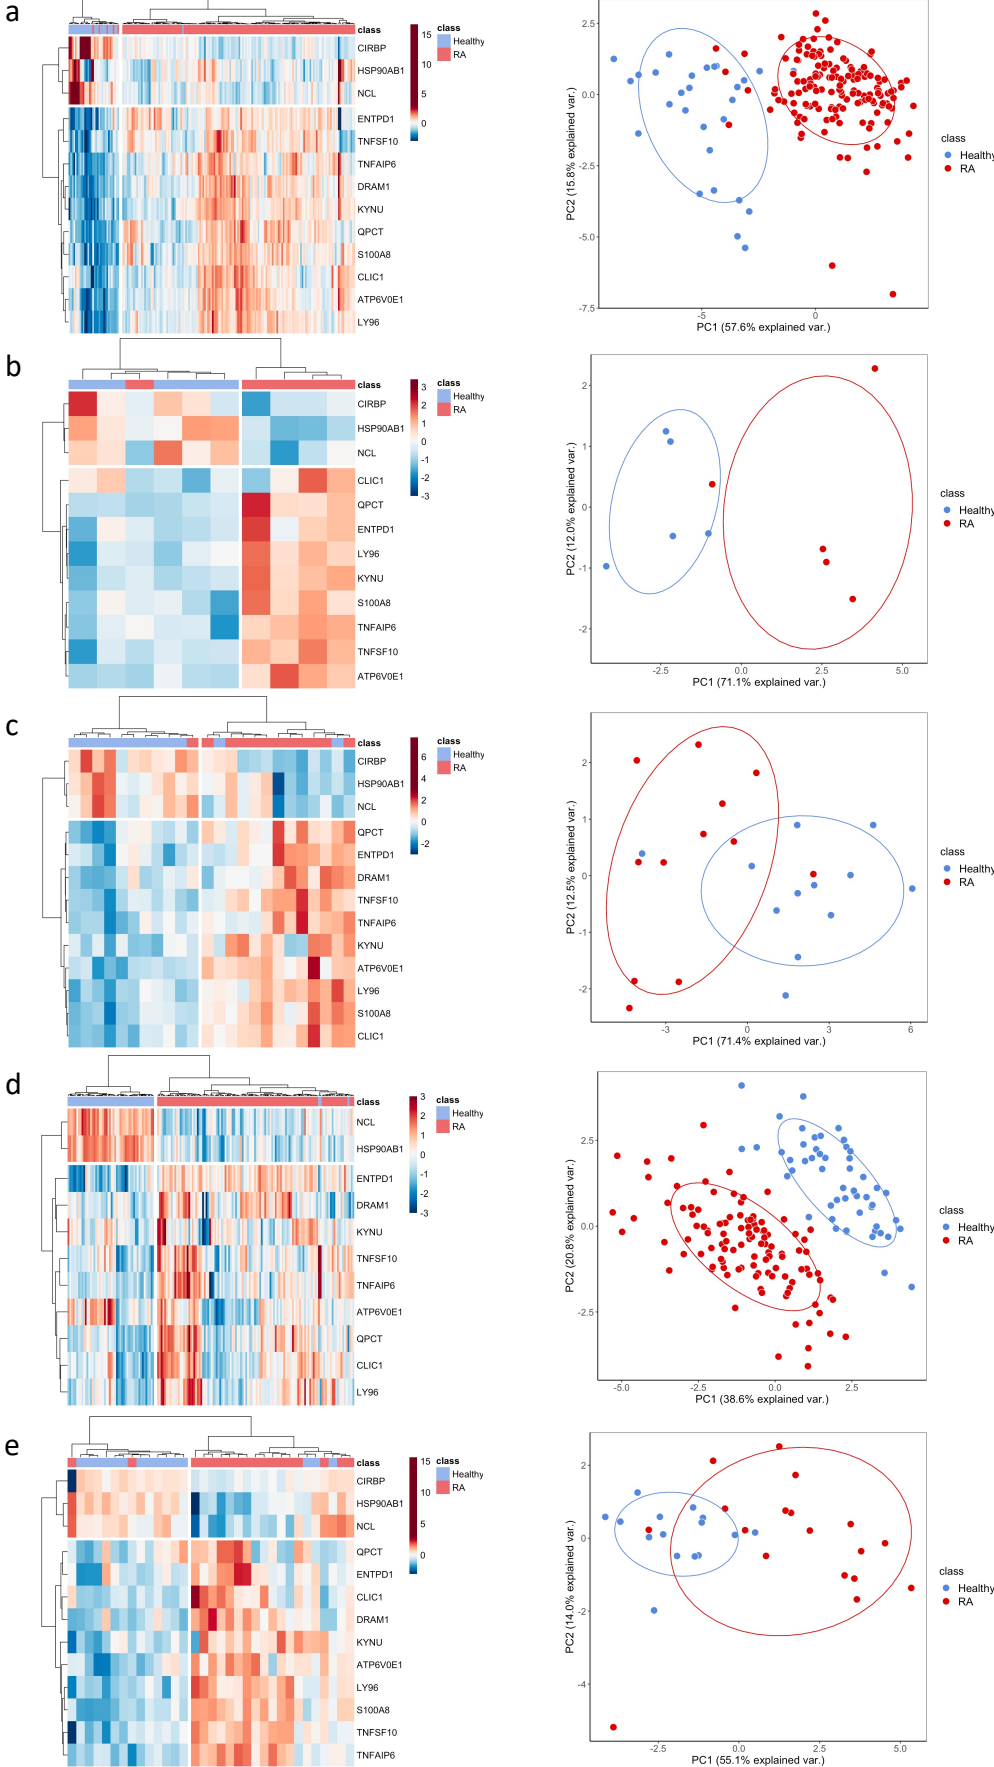

**Supplementary Figure 6. Validation Data Batch Correction, QC and PCA Plots**  
 Heatmap and PCA plots of 13 best performing genes on the independent validation a) synovium RNA-seq GSE89408, b) synovium microarray GSE1919, c) whole blood microarray GSE90081, d) PBMC RNA-seq GSE17755 and e) PBMC microarray GSE15573 datasets.



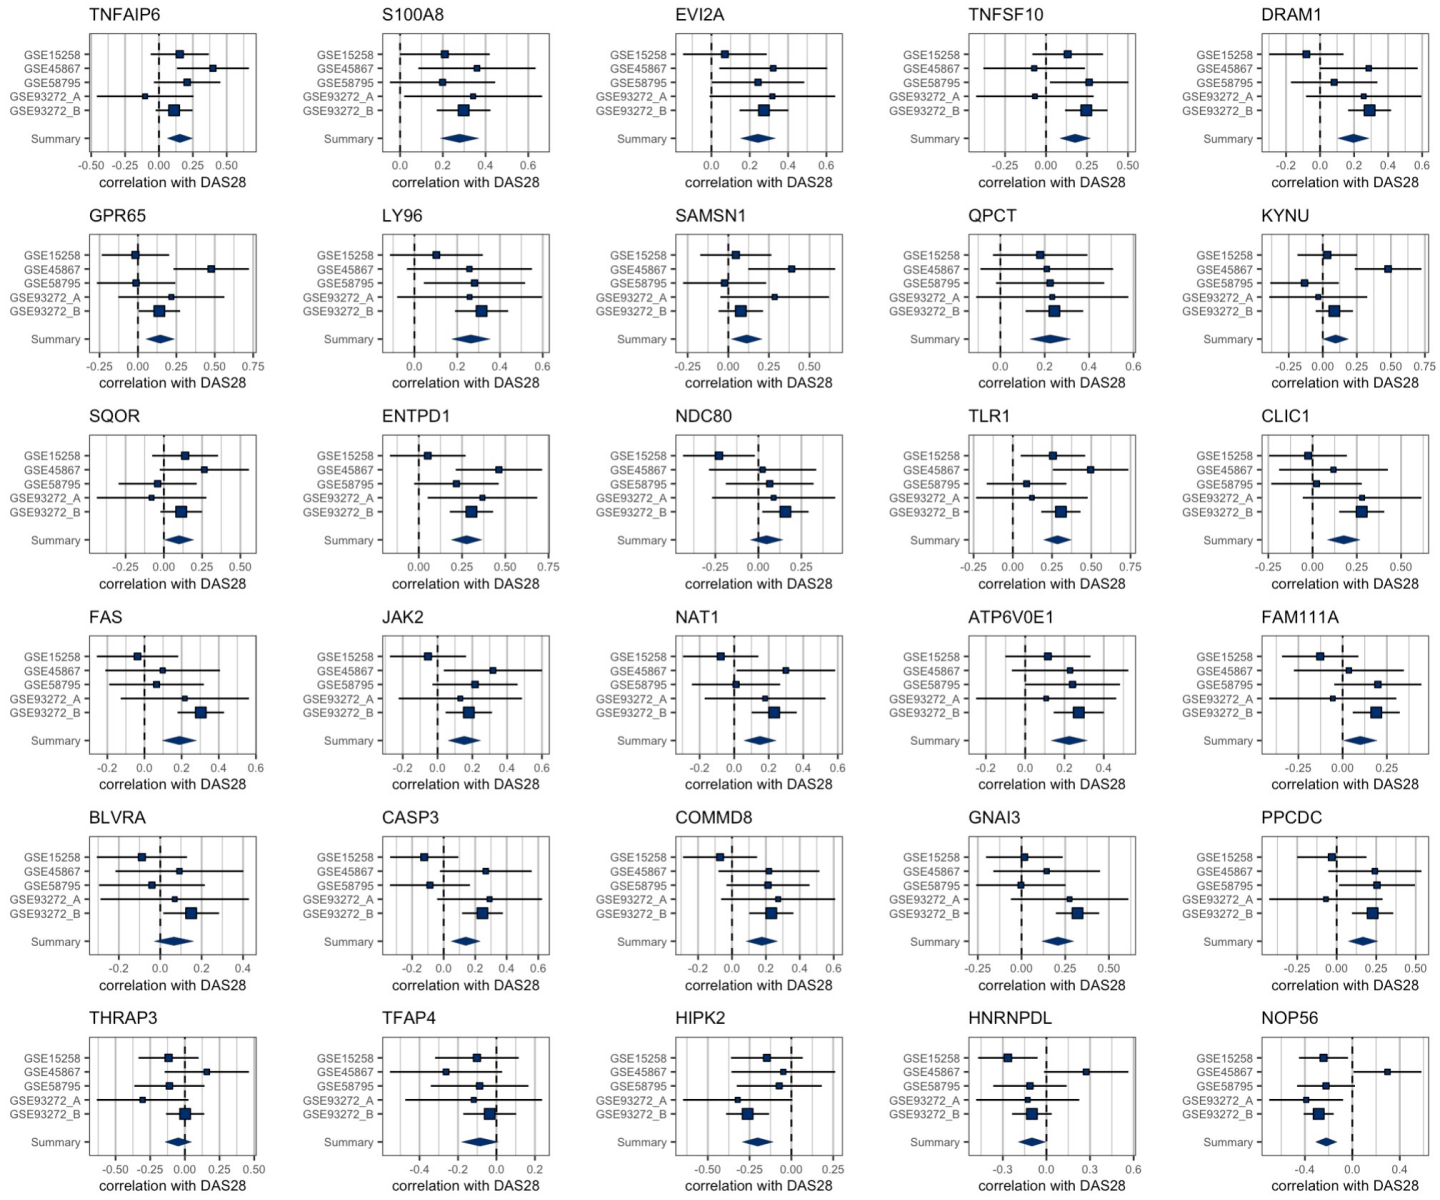

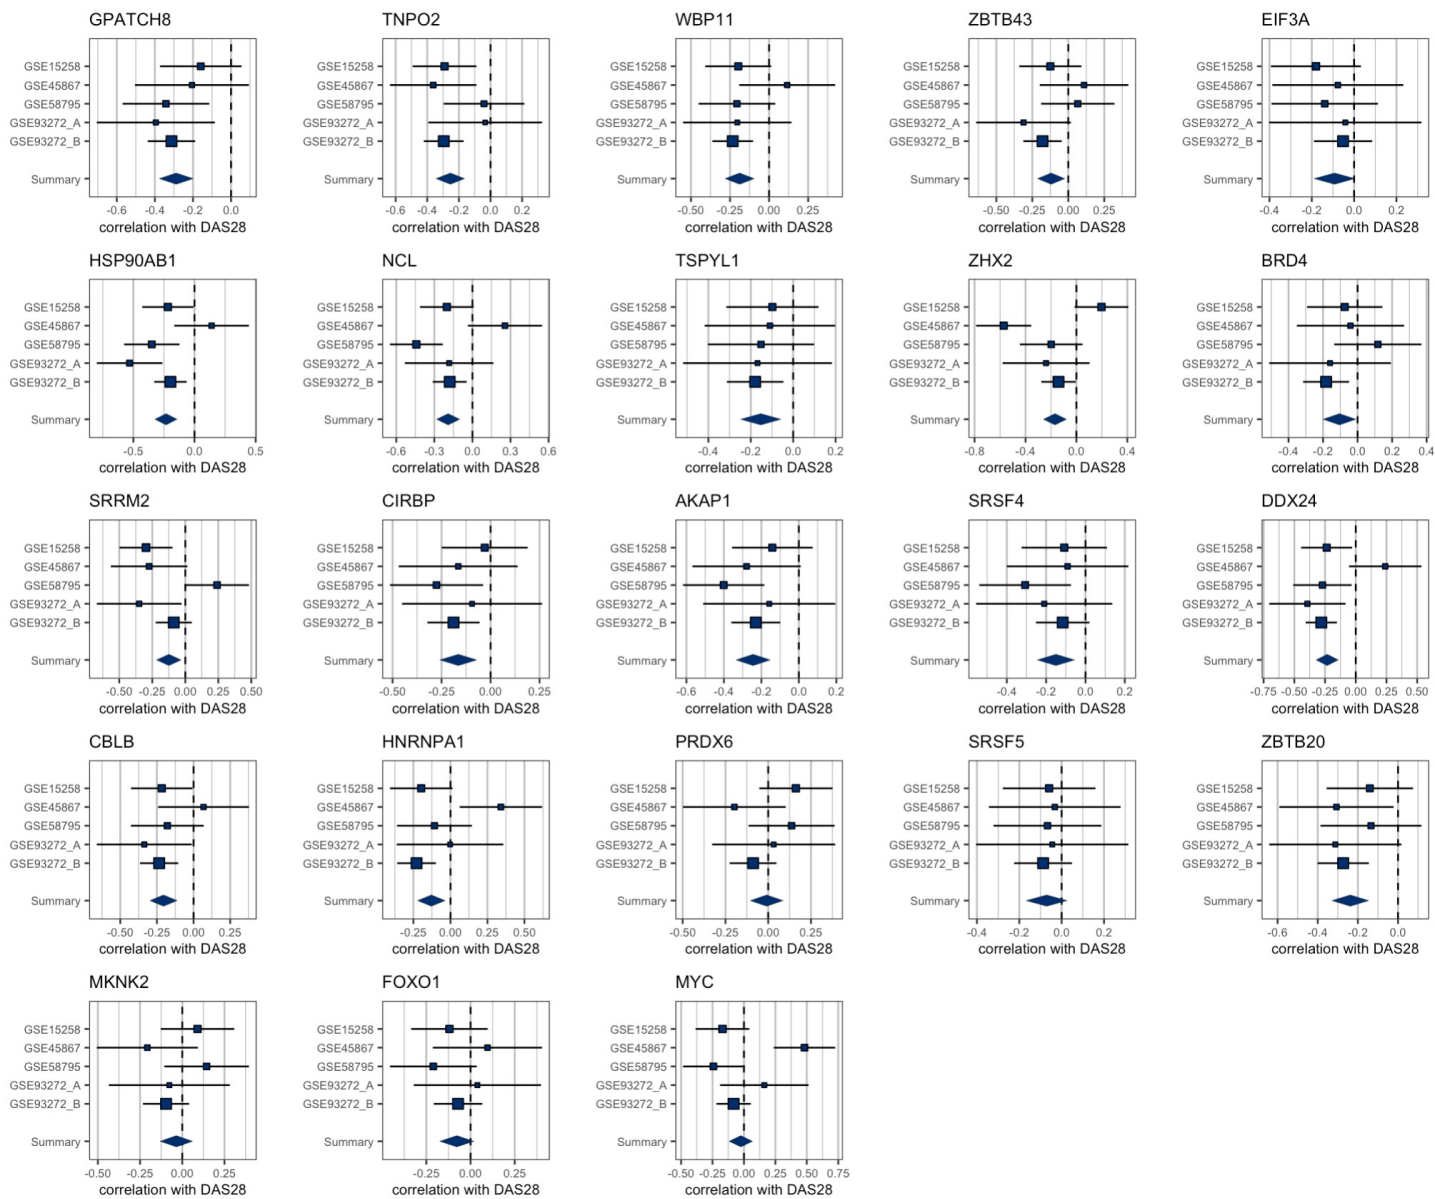

**Supplementary Figure 7. Correlation forest plots with DAS28 for all 53 feature selected genes.**

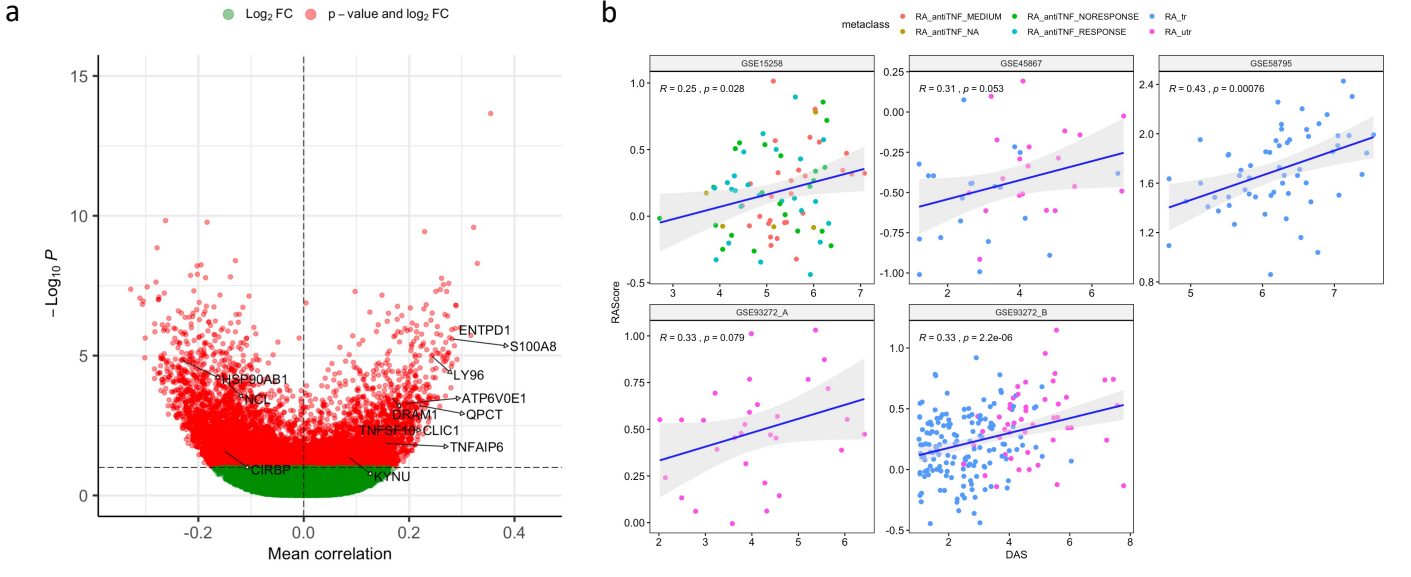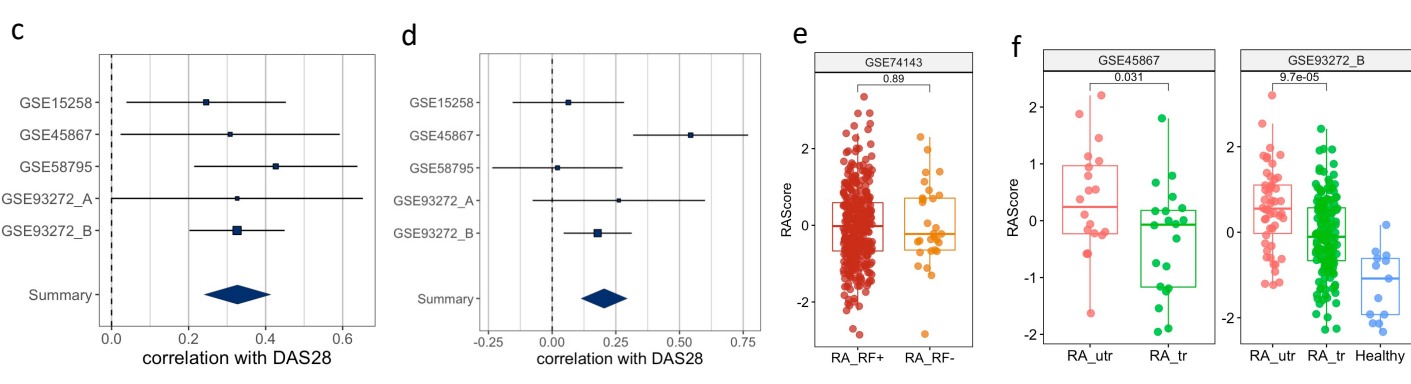

**Supplementary Figure 8. The RA Score correlates with DAS28 score, might track the treatment effect and independent of Rheumatoid Factor.** a) Volcano plot of correlations of DAS28 with all genes. The RAScore panel genes are highlighted. b) The correlation of the RA Score with DAS28 in synovium GSE45867 and blood GSE15258, GSE58795, GSE93272 datasets. A summary as a forest plot of correlation of DAS28 with c) a score from 13 random genes and d) RAScore. e) The RA Score shows no difference between RF+ and RF- phenotypes. f) The RA Score shows the possible treatment effect in both synovium and blood. RA\_utr: RA untreated. RA\_tr: RA treated.



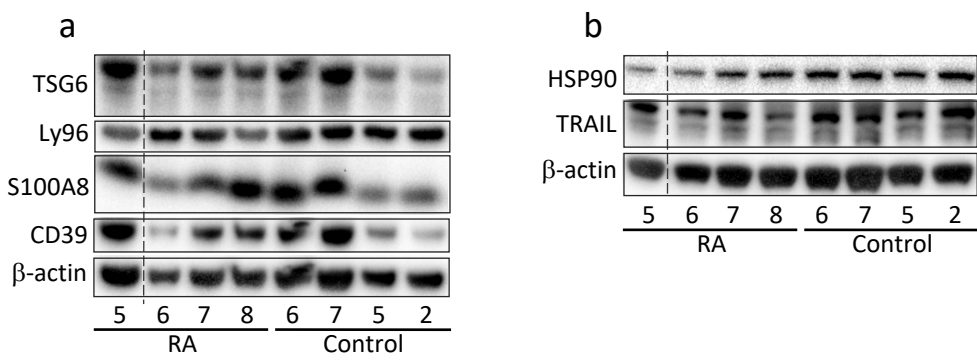

**Supplementary Figure 9. The second set of western blot gels. a) TSG6, Ly96, S100A8, CD39 and b) HSP90, TRAIL proteins.**
